# Supplementary material for: An adenine-modified chitosan cross-linked 8arm-PEG-CHO hydrogel for promoting infected wound healing
Source: Royal Society of Chemistry journal article supplement (doi:10.1039/d4qm00073k), 2024-01-01
Supplement: d4qm00073k1.pdf [file d4qm00073k1.pdf]

## Supporting Information

### Adenine-modified chitosan cross-linked 8arm-PEG-CHO hydrogel for promoting infected wound healing

Jiayi Jiang <sup>a,#</sup>, Tao Jiang <sup>b,#</sup>, Cong Zhou <sup>a</sup>, Yingjie He <sup>a</sup>, Ankang Jiang <sup>a</sup>, Guichun Yang <sup>a</sup>, Junqi Nie <sup>a</sup>, Feiyi Wang <sup>a</sup>, Xiaofan Yang <sup>b</sup>, Zhenbing Chen <sup>b,\*</sup>, Cuifen Lu <sup>a,\*</sup>

<sup>a</sup> Hubei Provincial Engineering Center of Performance Chemicals & Ministry-of-Edu-cation Key Laboratory for the Synthesis and Application of Organic Functional Molecules, Hubei University, Wuhan 430062, China.

E-mail: lucf@hubu.edu.cn

<sup>b</sup> Department of Hand Surgery, Union Hospital, Tongji Medical College, Huazhong University of Science and Technology, Wuhan 430022, China

E-mail: zbchen@hust.edu.cn.

# These authors contributed equally to this work.

\* Corresponding authors.

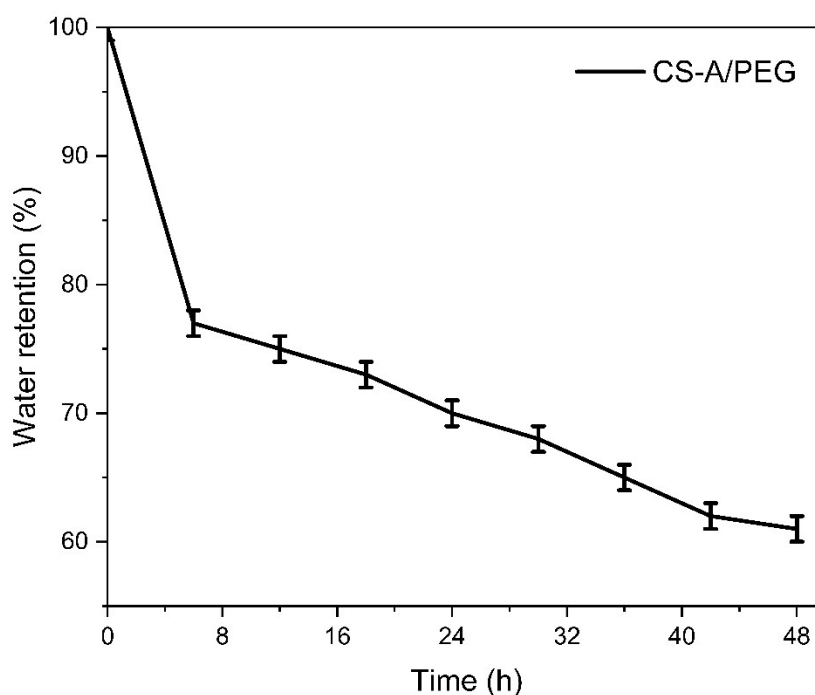

**Fig. S1** Water retention rate of CS-A/PEG-7.5% hydrogel.
